# Supplementary material for: Ticagrelor Enhances Release of Anti-Hypoxic Cardiac Progenitor Cell-Derived Exosomes Through Increasing Cell Proliferation In Vitro
Source: PubMed Central journal article supplement (PMC7016113; doi:10.1038/s41598-020-59225-7), 2020-02-12
Supplement: 41598_2020_59225_MOESM1_ESM.pdf [file 41598_2020_59225_MOESM1_ESM.pdf]

## Supplemental Material

### **Ticagrelor Enhances Release of Anti-Hypoxic Cardiac Progenitor Cell-Derived Exosomes Through Increasing Cell Proliferation In Vitro**

Valentina Casieri MSc<sup>1</sup>, Marco Matteucci PhD<sup>1</sup>, Emilio M. Pasanisi MD<sup>2</sup>, Angela Papa Msc<sup>2</sup>, Lucio Barile PhD<sup>3,4</sup>, Regina Fritsche-Danielson PhD<sup>5</sup>, Vincenzo Lionetti MD, PhD<sup>1,2\*</sup>  
<sup>1</sup>Institute of Life Sciences, Scuola Superiore Sant'Anna, Pisa, Italy; <sup>2</sup>Fondazione Toscana G. Monasterio, Pisa, Italy; <sup>3</sup>Laboratory for Cardiovascular Theranostics, Cardiocentro Ticino Foundation, 6900 Lugano, Switzerland; <sup>4</sup>Faculty of Biomedical Sciences, Università Svizzera Italiana, 6900 Lugano, Switzerland; <sup>5</sup>Research and early clinical development, Cardiovascular, Renal and Metabolism, Biopharmaceuticals R&D, AstraZeneca, Gothenburg, Sweden.

### **Supplemental figure legends**

**Supplemental Figure 1.** Surface marker expression profile in cardiac progenitor cells isolated from human auricle analysed by flow cytometry. Cardiac-derived mesenchymal progenitor cells express mesenchymal/stromal markers (CD90, CD73, CD105), but not the common leukocyte antigen CD45. CD117 is almost absent.

**Supplemental Figure 2.** Western blot representative image of P2Y<sub>12</sub> (52KDa MW) expression in human cardiac progenitor cells (hCPCs) and human vascular smooth muscle cells (VSMCs) in presence of normal protein loading as shown by glyceraldehyde 3-phosphate dehydrogenase (GAPDH; 37KDa MW) bands.

**Supplemental Figure 3.** Long-term treatment for 72h of human cardiac progenitor cells (hCPCs) with increasing dose of ticagrelor (Tic) does not alter intracellular expression of heat shock protein (HSP)-70. Representative images of cropped densitometric bands of proteins HSP70 are showed in panel A and full-length Western blots are showed in panel B. Levels of HSP70 are normalized on glyceraldehyde 3-phosphate dehydrogenase (GAPDH) levels and values are expressed as arbitrary units (a.u.). The full-length blots/gels of HSP70 and GAPDH proteins are shown in panel B. All measurements are mean  $\pm$  SD.

**Supplemental Figure 4.** Representative images of dynamic light scatter analyses of particle size and concentrations in each experimental condition by NanoSight Technology.

**Supplemental Figure 5.** Western blots assay of hCPCs-derived exosomes. Panel A and B show the full-length Western blots corresponding to cropped blots in the main text.

**Supplemental Figure 6.** Western blots assay of explant-derived hCPCs. It is shown the full-length Western blots corresponding to cropped blots in the main text.

**Supplemental Figure 7.** Western blots assay of explant-derived hCPCs (A) and hCPCs-derived exosomes (B). Panel A and B show the full-length Western blots corresponding to cropped blots in the main text.

**Supplemental Figure 8.** Western blots assay of HL1 cardiomyocytes. Panel A and B show the full-length Western blots corresponding to cropped blots in the main text.

**Supplemental Figure 9.** Western blots assay of explant-derived hCPCs (A) and hCPCs-derived exosomes (B). Panel A and B show the full-length Western blots corresponding to cropped blots in the main text. Panel A and B show the full-length Western blots corresponding to cropped blots in the main text.

**Supplemental Figure 10.** Western blots assay of HL1 cardiomyocytes. Panel A and B show the full-length Western blots corresponding to cropped blots in the main text.

Supplemental Figure 1.

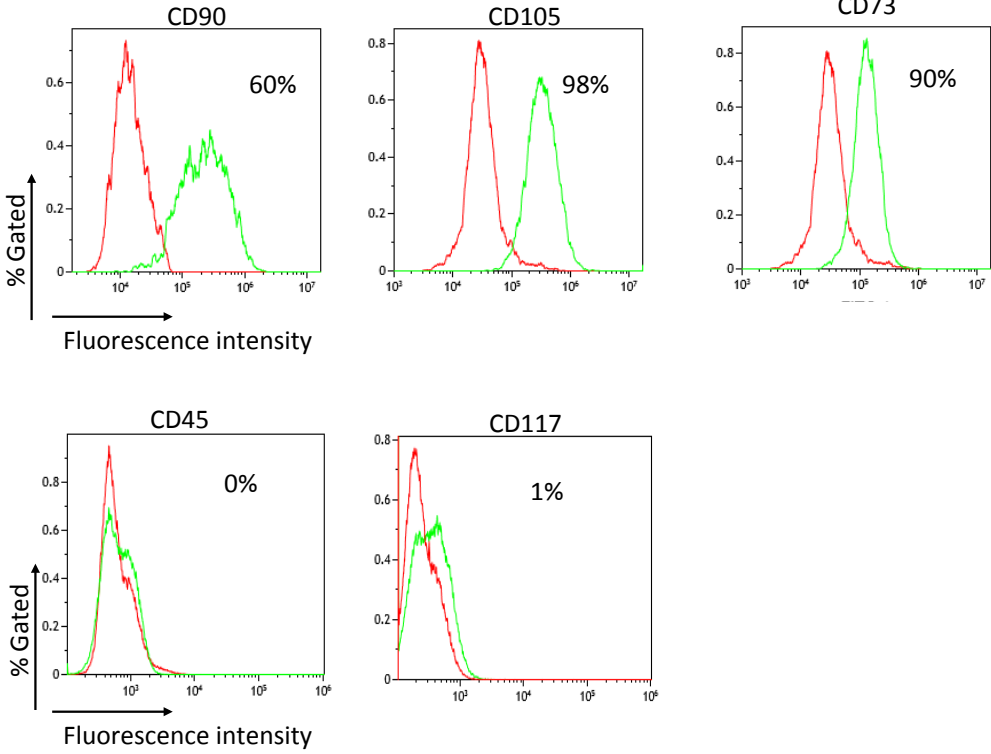

Supplemental Figure 2

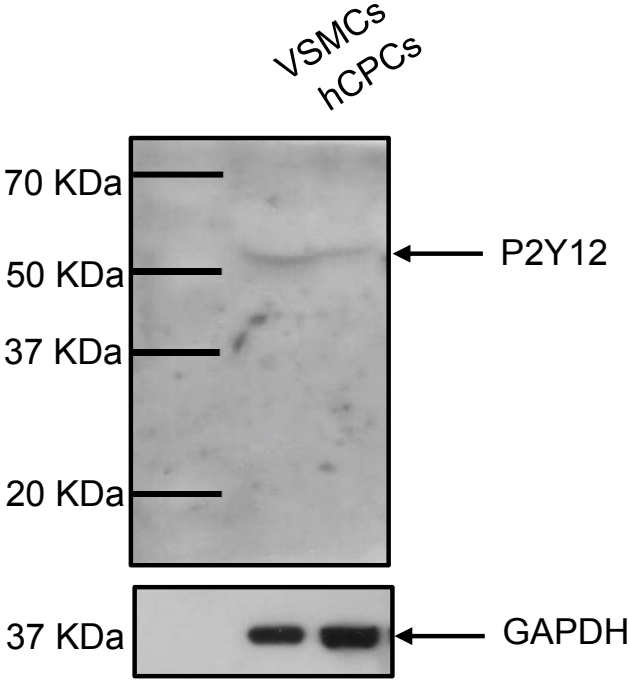

Supplemental Figure 3.

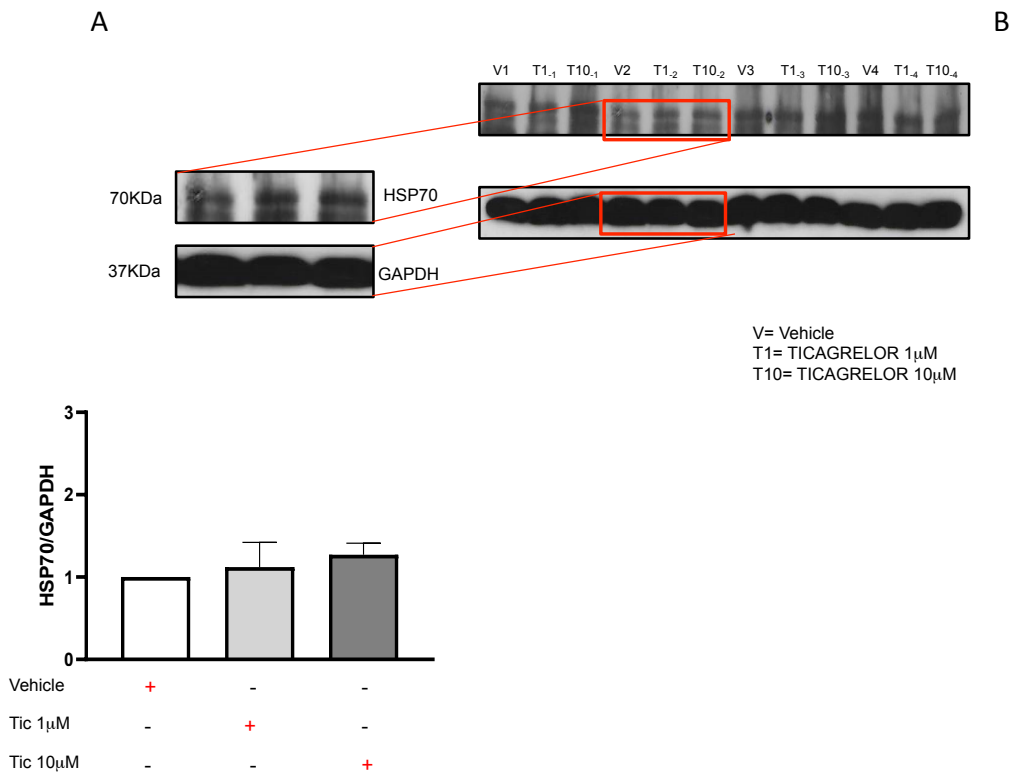

# Supplemental Figure 4.

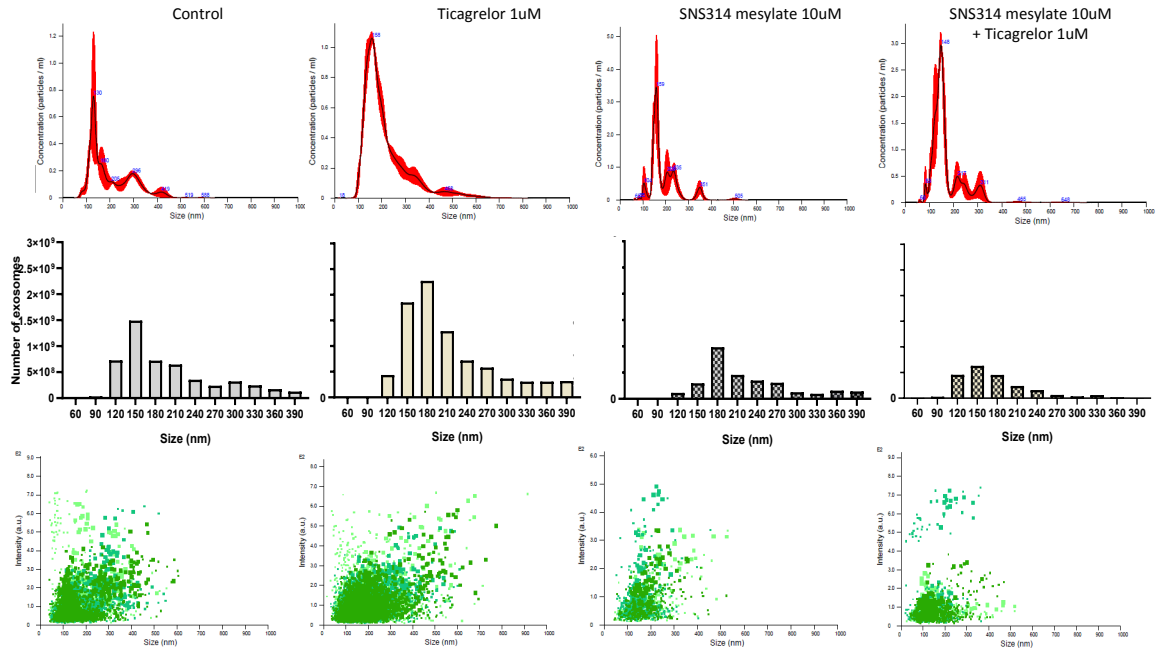

**Supplemental Figure 5.**

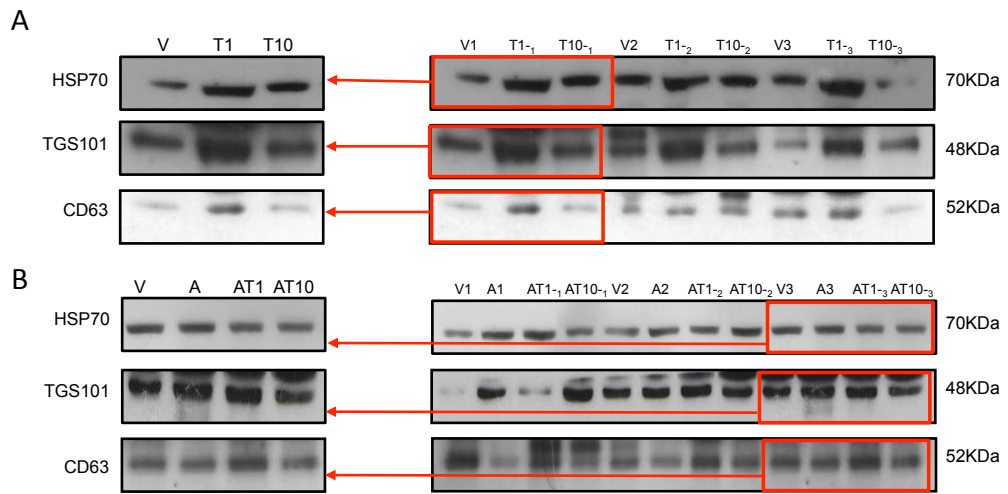

V= Vehicle  
T1= TICAGRELOR 1 $\mu$ M  
T10= TICAGRELOR 10 $\mu$ M  
A= ADENOSINE 10 $\mu$ M  
AT1= ADENOSINE 10 $\mu$ M+Ticagrelor 1 $\mu$ M  
AT10 = ADENOSINE 10 $\mu$ M+ Ticagrelor 10 $\mu$ M



# Supplemental Figure 6.

A

B

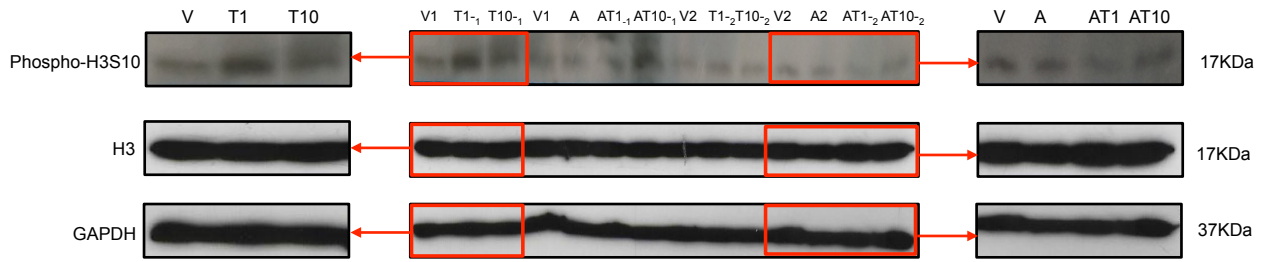

V= Vehicle  
T1= TICAGRELOR 1 $\mu$ M  
T10= TICAGRELOR 10 $\mu$ M  
A= ADENOSINE 10 $\mu$ M  
AT1= ADENOSINE 10 $\mu$ M+Ticagrelor 1 $\mu$ M  
AT10 = ADENOSINE 10 $\mu$ M+ Ticagrelor 10 $\mu$ M

## Supplemental Figure 7

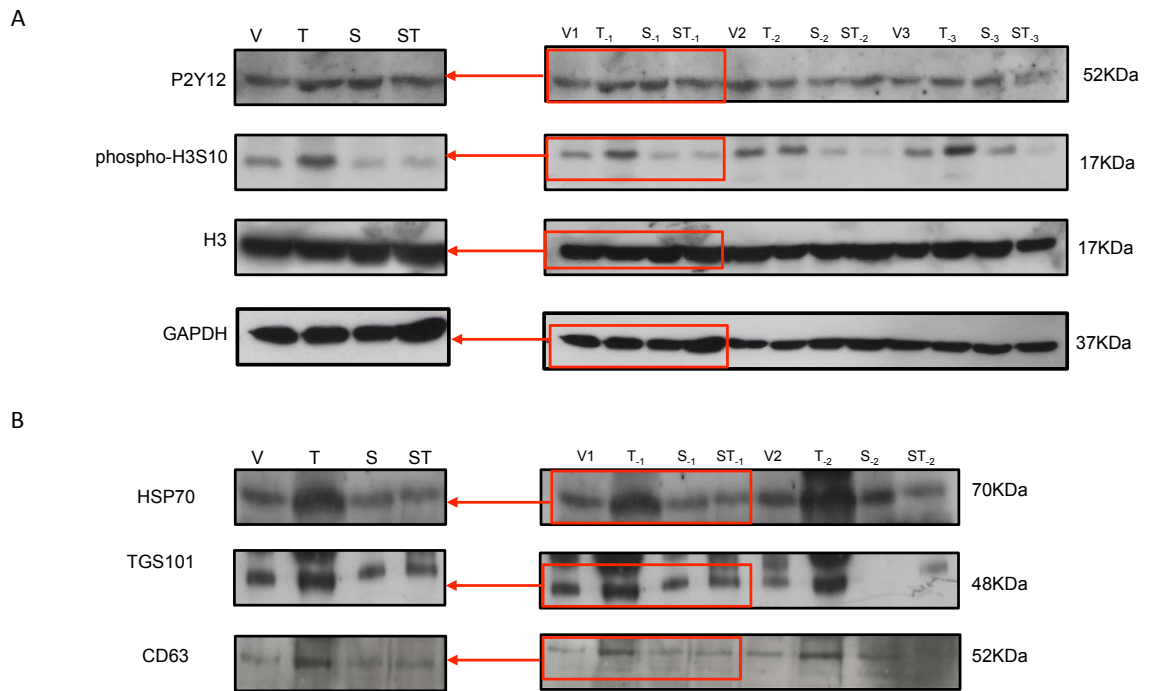

V= Vehicle  
T= TICAGRELOR 1 $\mu$ M  
S= SNS314-mesyate 10 $\mu$ M  
ST= SNS314-mesyate 10 $\mu$ M+ TICAGRELOR 1 $\mu$ M

## Supplemental Figure 8.

A

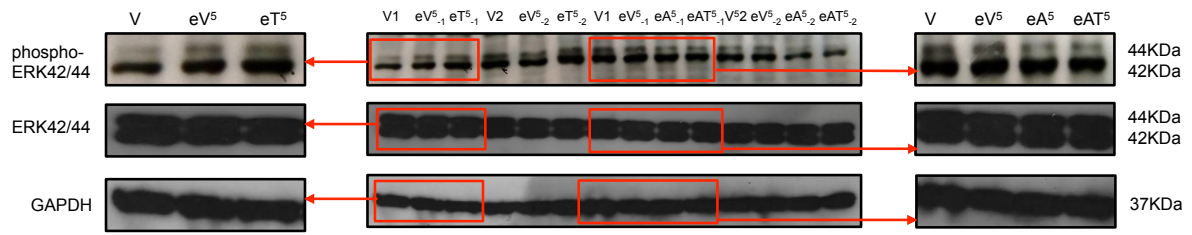

B

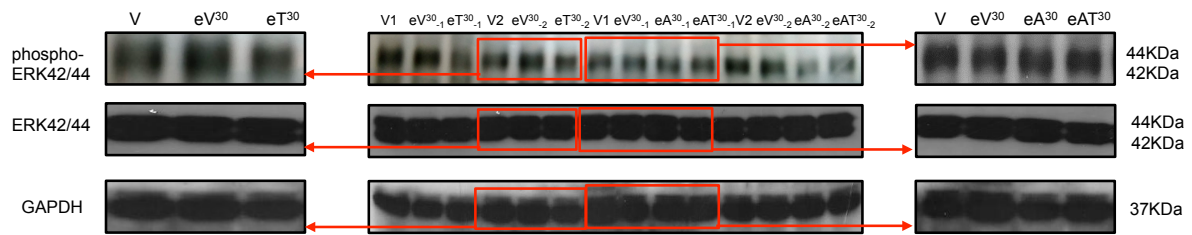

V= Vehicle  
eV<sup>5</sup>= exo-VEHICLE 5 MINUTES  
eT<sup>5</sup> = exo-TICAGRELOR 1 $\mu$ M 5 MINUTES

V= Vehicle  
eV<sup>30</sup>= exo-VEHICLE 30 MINUTES  
eT<sup>30</sup> = exo-TICAGRELOR 1 $\mu$ M 30 MINUTES

V= Vehicle  
eV<sup>5</sup>= exo-VEHICLE 5 MINUTES  
eA<sup>5</sup>= exo-ADENOSINE 10 $\mu$ M 5 MINUTES  
eAT<sup>5</sup> = exo-ADENOSINE 10 $\mu$ M+TICAGRELOR 1 $\mu$ M 5 MINUTES

V= Vehicle  
eV<sup>30</sup>= exo-VEHICLE 30 MINUTES  
eA<sup>30</sup>= exo-ADENOSINE 10 $\mu$ M 30 MINUTES  
eAT<sup>30</sup>= exo-ADENOSINE 10 $\mu$ M+TICAGRELOR 1 $\mu$ M 30 MINUTES

# Supplemental Figure 9

**A**

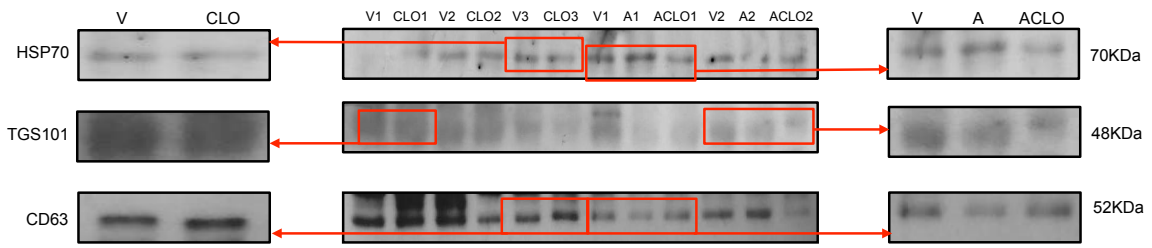

**B**

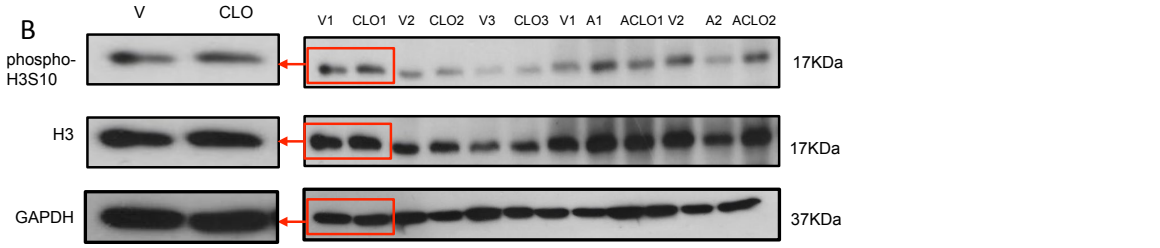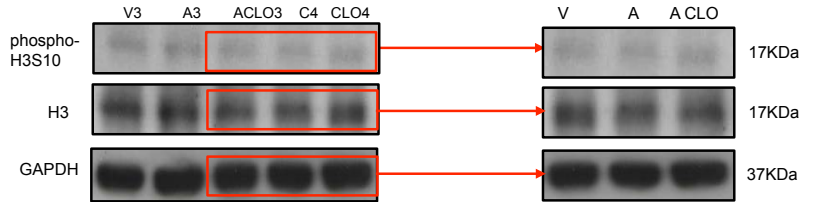

V= Vehicle  
 CLO= 200nM-CLOPIDOGREL 3.75µM  
 A= ADENOSINE 10µM  
 ACLO=ADENOSINE 10µM+200nM-CLOPIDOGREL 3.75µM

**Supplemental Figure 10.**

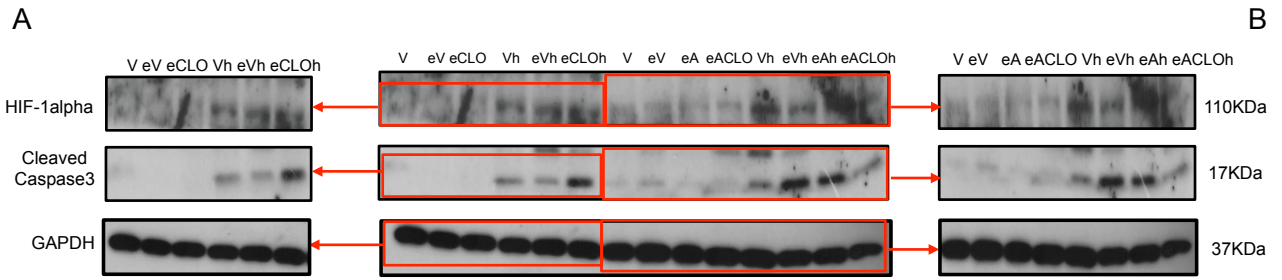

V= Vehicle  
 eV= exo-VEHICLE  
 eCLO= exo-2oxo-CLOPIDOGREL 3.75 $\mu$ M  
 Vh= VEHICLE HYPOXIA  
 eVh= exo-VEHICLE HYPOXIA  
 eCLOh= exo-2oxo-CLOPIDOGREL 3.75 $\mu$ M HYPOXIA  
 eA= exo-ADENOSINE 10 $\mu$ M  
 eACLO= exo-ADENOSINE10 $\mu$ M+2oxo-CLOPIDOGREL 3.75 $\mu$ M  
 eAh= exo-ADENOSINE 10 $\mu$ M HYPOXIA  
 eACLOh= exo-ADENOSINE10 $\mu$ M+2oxo-CLOPIDOGREL 3.75 $\mu$ M HYPOXIA
